# Supplementary material for: Porous nickel cobaltite nanorods: desired morphology inherited from coordination precursors and improved supercapacitive properties
Source: Royal Society of Chemistry journal article supplement (doi:10.1039/c3ra42080a), 2013-01-01
Supplement: c3ra42080a.pdf [file c3ra42080a.pdf]

Electronic Supplementary Information for

**Porous nickel cobaltite nanorods: desired morphology inherited  
from coordination precursors and improved supercapacitive  
properties**

Corresponding author. Yijing Wang\*

Institute of New Energy Material Chemistry, Key Laboratory of Advanced Energy  
Materials Chemistry (MOE), *Tianjin Key Lab on Metal and Molecule-based Material  
Chemistry*, Nankai University, Tianjin 300071, P.R. China

Email address: wangyj@nankai.edu.cn

**Supplementary Figures**

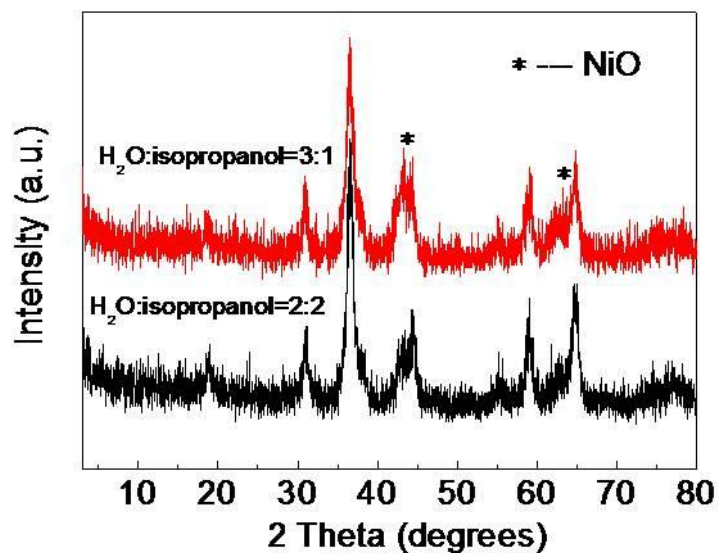

**Fig.S1** XRD patterns of the samples prepared at 180 °C for 6 h with different solvents.

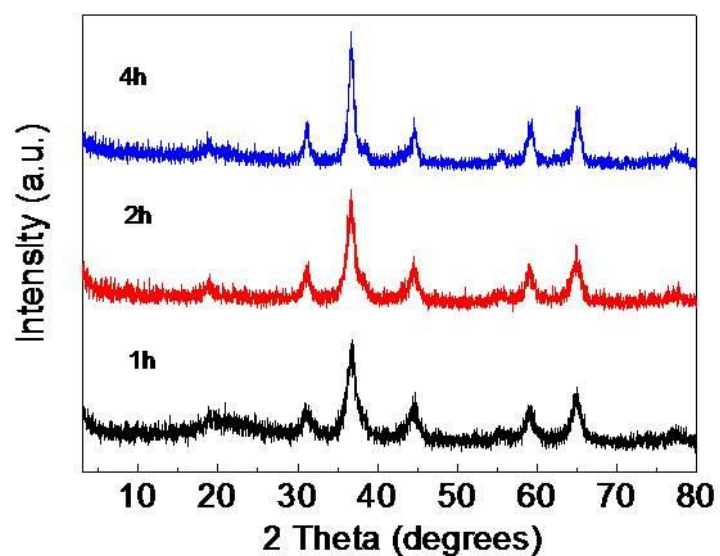

**Fig.S2.** XRD patterns of prepared products at 180 °C for different time with the 40 ml mixed solvent of deionized water (10 mL) and isopropyl alcohol (30 mL).
